# Supplementary material for: Chemsex and incidence of sexually transmitted infections among Canadian pre-exposure prophylaxis (PrEP) users in the l’Actuel PrEP Cohort (2013–2020)
Source: PubMed Central journal article supplement — Sex Transm Infect. 2022 Jan 17;98(8):549–56. doi: 10.1136/sextrans-2021-055215 (PMC9685712; doi:10.1136/sextrans-2021-055215), 2022-01-17
Supplement: sextrans-2021-055215supp003.pdf [file sextrans-2021-055215supp003.pdf]

## Résumé

**Objectifs** : L'utilisation des drogues illicites au cours d'actes sexuels (le chemsex) pourrait augmenter la transmission du VIH et des autres ITS. La prophylaxie préexposition (PrEP) est très efficace pour prévenir la transmission du VIH, représentant un outil de prévention important pour ceux qui pratiquent le chemsex. Cependant, la PrEP ne réduit pas le risque d'acquisition des autres ITS. Cette étude vise à comprendre l'impact du chemsex sur l'incidence des ITS chez les hommes gais, bisexuels et autres hommes ayant des relations sexuelles avec d'autres hommes (gbHARSAH) et les femmes transgenres utilisant la PrEP à Montréal (Canada).

**Méthodes** : Les données de la cohorte PrEP de l'Actuel (Canada) pendant la période de 2013-2020 ont été utilisées. Plus précisément, les données démographiques et comportementales collectées à la 1<sup>ère</sup> visite, ainsi que les données de dépistage d'ITS pendant le suivi sont analysées. Nous avons estimé l'impact du chemsex rapporté au départ sur l'incidence cumulative de la gonorrhée et de la chlamydia pendant les 24 mois suivant l'initiation de la PrEP, en utilisant des courbes Kaplan-Meier et des analyses de survie. Nous avons également examiné le rôle de la polyconsommation et des modificateurs d'effet sociodémographiques.

**Résultats** : Il y a eu 2 086 clients (2 079 gbHARSAH cisgenres, 3 gbHARSAH transgenres, 4 femmes transgenres) qui ont initié la PrEP et contribué au total 1 477 années-personnes de suivi. Il n'y a eu aucun diagnostic incident du VIH. En ajustant pour des variables sociodémographiques, le risque d'un diagnostic incident de gonorrhée ou de chlamydia était 32% plus élevé parmi les clients qui ont rapporté du chemsex (HR ajusté=1,32; IC à 95%: 1,10–1,57), ce qui équivaut à une augmentation du risque absolu de 8,9 points de pourcentage (IC à 95% : 8,5–9,4). Cet effet était plus fort parmi ceux rapportant de la polyconsommation (HR ajusté=1,51; IC à 95%: 1,21–1,89). L'effet du chemsex était modifié par l'âge, l'éducation, et le revenu.

**Conclusion** : Chez les utilisateurs de la PrEP, le chemsex est lié à une plus forte incidence de la gonorrhée et de la chlamydia. Cet effet est encore plus grand pour ceux rapportant de la polyconsommation. L'incidence élevée d'ITS parmi les gbHARSAH met en évidence l'importance de la PrEP pour cette population et le besoin pour des services intégrés qui répondent aux besoins de ceux qui pratiquent le chemsex.
